# Supplementary material
Source: PubMed Central journal article supplement (PMC8691137)

Table S1: Multiple regression analyses predicting coping from EF at the 1-year visit

|               | Approach Composite |      |      |         | Avoidance Composite |      |      |                | Behavioral Disengagement |       |      |                | Mental Disengagement |       |      |                | Denial |       |      |         |
|---------------|--------------------|------|------|---------|---------------------|------|------|----------------|--------------------------|-------|------|----------------|----------------------|-------|------|----------------|--------|-------|------|---------|
|               | R2                 | B    | SE B | $\beta$ | R2                  | B    | SE B | $\beta$        | R2                       | B     | SE B | $\beta$        | R2                   | B     | SE B | $\beta$        | R2     | B     | SE B | $\beta$ |
| Objective EF  | .054               | .016 | .060 | .023    | .074                | .031 | .011 | <b>-.252**</b> | <b>.095*</b>             | -.159 | .051 | <b>-.266**</b> | .076                 | -.206 | .074 | <b>-.241**</b> | .114   | -.008 | .046 | -.015   |
| Subjective EF | .058               | .050 | .053 | .075    | <b>.136**</b>       | .042 | .009 | <b>.346**</b>  | <b>.138**</b>            | .192  | .045 | <b>.325**</b>  | <b>.084*</b>         | .203  | .066 | <b>.240**</b>  | .134   | .079  | .041 | .147    |

Footnote: Multiple regression analyses predicting approach and avoidance coping composites and avoidance subscales from objective and subjective EF. Each model includes *a priori* hypothesized covariates: IQ, race, age, cancer stage, receipt of chemotherapy, and endocrine therapy. Abbreviations: EF = executive functioning. \*  $p < .05$ , \*\*  $p < .01$

Table S2: Multiple regression analyses predicting depressive symptoms from EF and coping at the 1-year visit

|                                   | Depressive Symptoms |       |       |                    |
|-----------------------------------|---------------------|-------|-------|--------------------|
|                                   | R2                  | B     | SE B  | Beta               |
| Model 1: Objective EF             | .070                | -.304 | .163  | -.162 <sup>+</sup> |
| Model 2: Subjective EF            | <b>.340**</b>       | 1.043 | .123  | <b>.561**</b>      |
| Model 3: Approach Composite       | .050                | -.009 | .217  | -.003              |
| Model 3: Avoidance Composite      | <b>.139**</b>       | 4.596 | 1.126 | <b>.301**</b>      |
| Model 4: Behavioral Disengagement | <b>.135**</b>       | .932  | .234  | <b>.296**</b>      |
| Model 5: Mental Disengagement     | <b>.120**</b>       | .588  | .164  | <b>.268**</b>      |
| Model 6: Denial                   | .053                | .183  | .278  | .053               |

Footnote: Multiple regression analyses predicting depressive symptoms from objective and subjective EF, approach and avoidance coping composites, and avoidance subscales. Each model includes *a priori* hypothesized covariates: IQ, race, age, cancer stage, receipt of chemotherapy, and endocrine therapy. Abbreviations: EF = executive functioning. \*  $p < .05$ , \*\*  $p < .01$ , + = .06

## Figure Captions

Figure S1: Mediation models of the associations between objective (1a) and subjective (1b) EF at 6 months and depressive symptoms at 2 years mediated by behavioral disengagement at 1 year among breast cancer survivors. Unstandardized regression coefficients for all paths and the 95% CI for the indirect path are reported. Each model included *a priori* hypothesized covariates including IQ, race, age, cancer stage, receipt of chemotherapy, and endocrine therapy. Abbreviations: a, direct effect of EF on behavioral disengagement; b, direct effect of behavioral disengagement on depressive symptoms after controlling for EF; c, total effect of EF on depressive symptoms; c', direct effect of EF on depressive symptoms after controlling for behavioral disengagement; ab, indirect effect of EF on depressive symptoms mediated by behavioral disengagement, EF = executive functioning. \*  $p < .05$ , \*\*  $p < .01$

Figure S2: Mediation models of the associations between objective (1a) and subjective (1b) EF at 6 months and depressive symptoms at 2 years mediated by mental disengagement at 1 year among breast cancer survivors. Unstandardized regression coefficients for all paths and the 95% CI for the indirect path are reported. Each model included *a priori* hypothesized covariates including IQ, race, age, cancer stage, receipt of chemotherapy, and endocrine therapy. Abbreviations: a, direct effect of EF on mental disengagement; b, direct effect of mental disengagement on depressive symptoms after controlling for EF; c, total effect of EF on depressive symptoms; c', direct effect of EF on depressive symptoms after controlling for mental disengagement; ab, indirect effect of EF on depressive symptoms mediated by mental disengagement, EF = executive functioning. \*  $p < .05$ , \*\*  $p < .01$

**Supplementary Figure 1: Behavioral disengagement as mediator**

1a. Objective EF as predictor

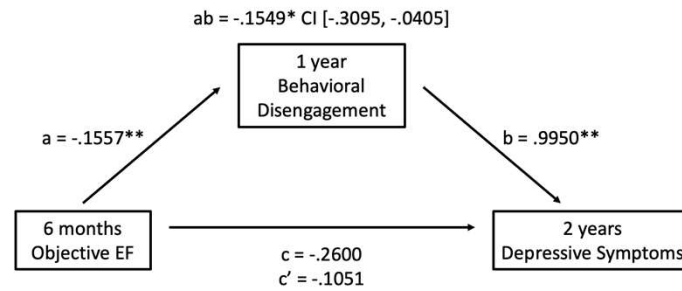

1b. Subjective EF as predictor

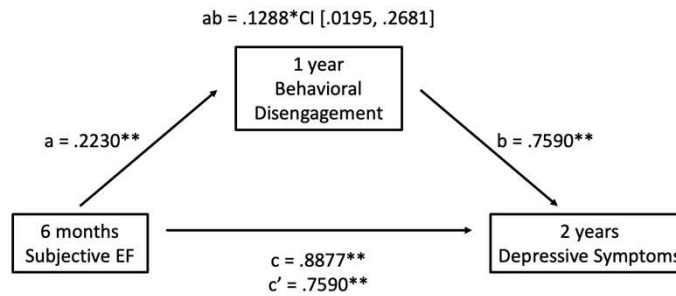

**Supplementary Figure 2: Mental disengagement as mediator**

2a. Objective EF as predictor

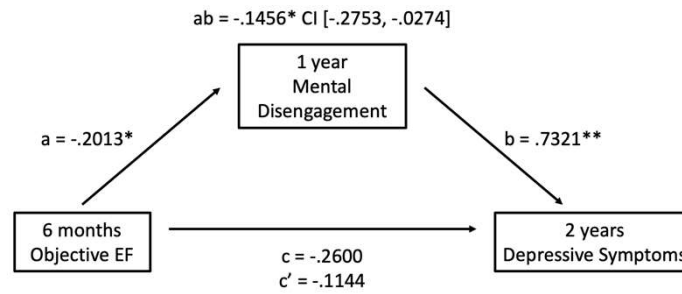

2b. Subjective EF as predictor

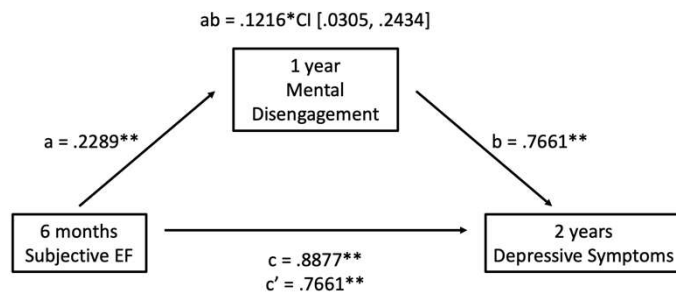

Supplement: NIHMS1764065-supplement-Supplementary_Materials.pdf [file NIHMS1764065-supplement-Supplementary_Materials.pdf]
